# Supplementary material for: Structural Properties of Polyphenols Causing Cell Cycle Arrest at G1 Phase in HCT116 Human Colorectal Cancer Cell Lines
Source: PubMed Central journal article supplement (PMC3759946; doi:10.3390/ijms140816970), 2013-08-19
Supplement: ijms-14-16970-s001.pdf [file ijms-14-16970-s001.pdf]

## Supplementary Information

**Table S1.** Experimental and predicted values with residual values for the training set and test set. Asterisk (\*) denotes the test set.

|             | Experimental data | CoMFA     |            | CoMSIA    |            |
|-------------|-------------------|-----------|------------|-----------|------------|
|             |                   | Predicted | Residual/% | Predicted | Residual/% |
| <b>1</b>    | 1.73              | 1.718     | 0.67       | 1.730     | 0.00       |
| <b>2</b>    | 1.68              | 1.687     | -0.41      | 1.697     | -1.02      |
| <b>3</b>    | 1.67              | 1.675     | -0.29      | 1.679     | -0.53      |
| <b>4</b>    | 1.70              | 1.701     | -0.03      | 1.670     | 1.74       |
| <b>5 *</b>  | 1.65              | 1.828     | -10.80     | 1.792     | -8.62      |
| <b>6</b>    | 1.59              | 1.585     | 0.30       | 1.591     | -0.04      |
| <b>7</b>    | 1.62              | 1.627     | -0.41      | 1.621     | -0.08      |
| <b>8</b>    | 1.56              | 1.558     | 0.13       | 1.559     | 0.06       |
| <b>9</b>    | 1.56              | 1.558     | 0.11       | 1.560     | 0.00       |
| <b>10 *</b> | 1.76              | 1.634     | 7.14       | 1.626     | 7.59       |
| <b>11</b>   | 1.65              | 1.649     | 0.05       | 1.652     | -0.14      |
| <b>12</b>   | 1.66              | 1.659     | 0.07       | 1.660     | -0.02      |
| <b>13</b>   | 1.97              | 1.971     | -0.06      | 1.980     | -0.48      |
| <b>14</b>   | 2.07              | 2.054     | 0.78       | 2.037     | 1.58       |
| <b>15</b>   | 1.84              | 1.844     | -0.22      | 1.862     | -1.19      |
| <b>16 *</b> | 2.41              | 2.070     | 14.09      | 2.094     | 13.10      |
| <b>17</b>   | 1.79              | 1.797     | -0.41      | 1.800     | -0.53      |
| <b>18</b>   | 1.99              | 1.987     | 0.16       | 1.967     | 1.16       |
| <b>19</b>   | 1.89              | 1.893     | -0.15      | 1.902     | -0.62      |
| <b>20</b>   | 2.01              | 2.014     | -0.21      | 2.042     | -1.60      |
| <b>21</b>   | 1.98              | 1.973     | 0.35       | 1.962     | 0.89       |
| <b>22 *</b> | 2.01              | 1.917     | 4.61       | 1.873     | 6.82       |
| <b>23 *</b> | 1.63              | 1.745     | -7.04      | 1.701     | -4.35      |
| <b>24</b>   | 1.78              | 1.785     | -0.28      | 1.800     | -1.10      |
| <b>25</b>   | 1.76              | 1.769     | -0.51      | 1.738     | 1.22       |
| <b>26</b>   | 1.78              | 1.769     | 0.63       | 1.770     | 0.57       |
| <b>27</b>   | 2.35              | 2.357     | -0.29      | 2.351     | -0.03      |

**Figure S1.** Plot of the experimental data versus the predicted values obtained from CoMFA model.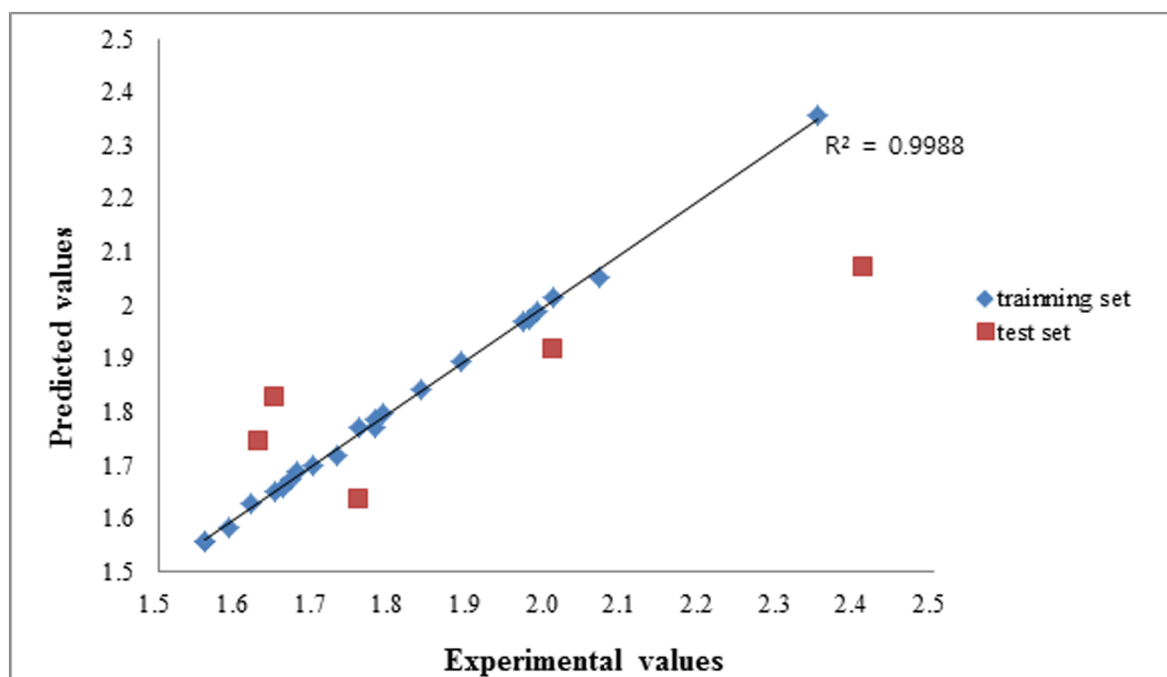**Figure S2.** Plot of the experimental data versus the predicted values obtained from CoMSIA model.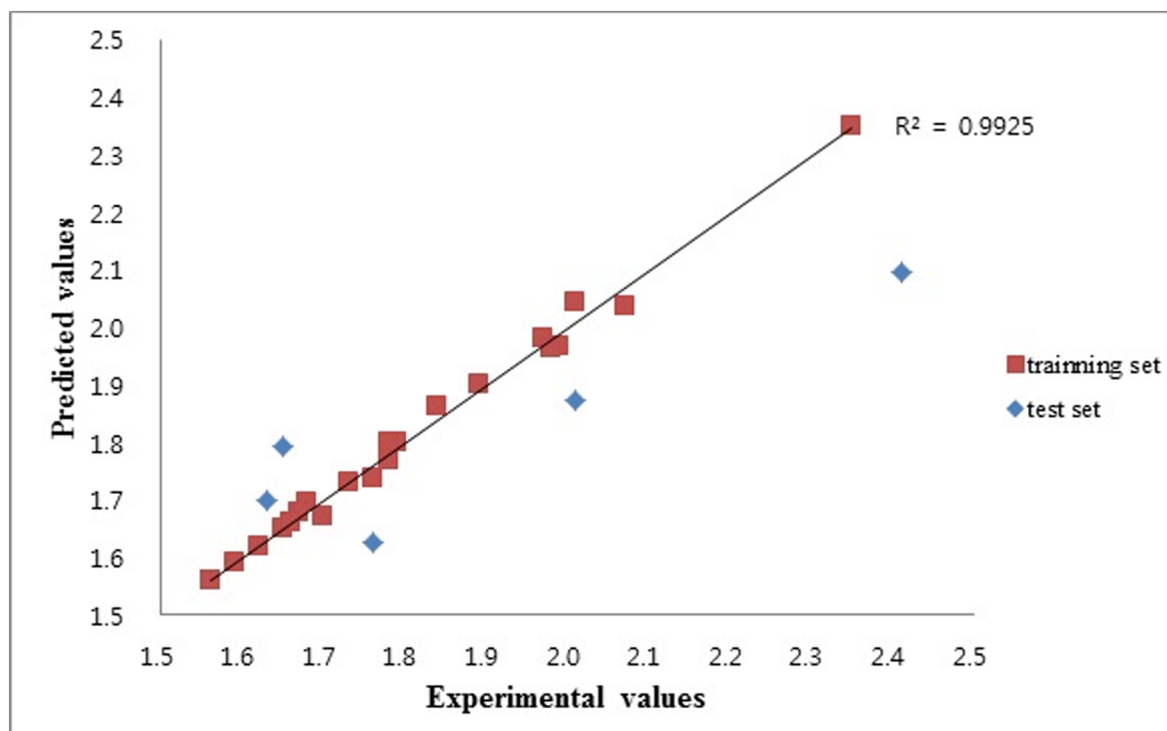

**Figure S3.** The scaffolds used to obtain the 3D structures of polyphenols 6–27, where the structures were constructed based on the X-ray crystallographic structures.

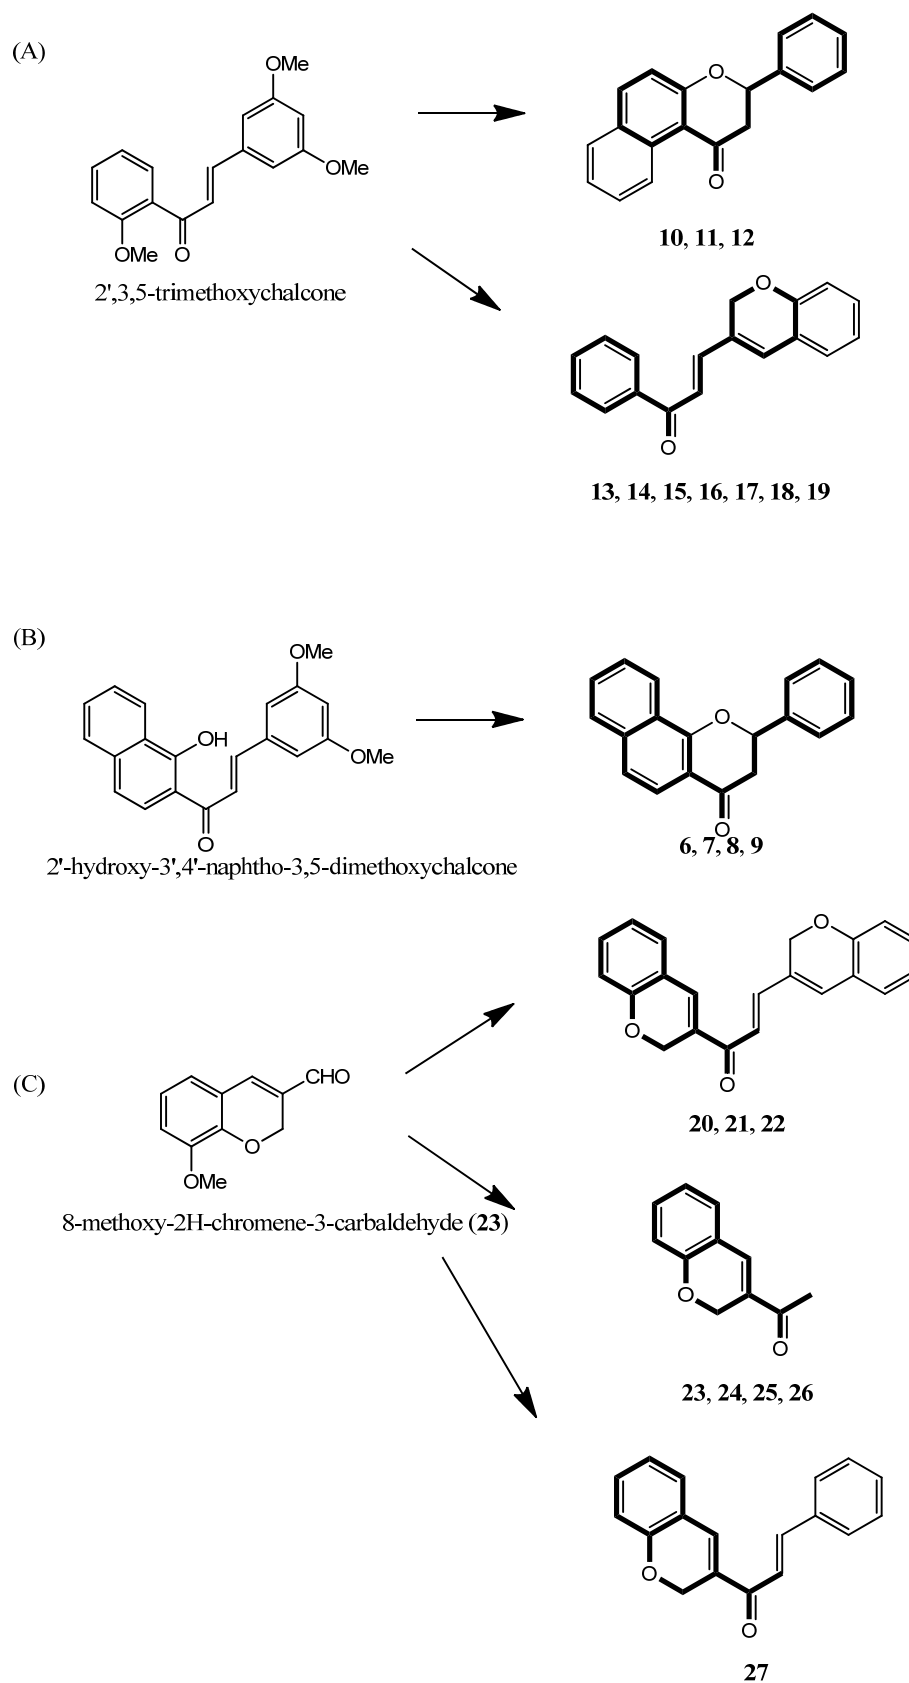

**Figure S4.** Alignment of training set and test set compounds on polyphenol **9**.

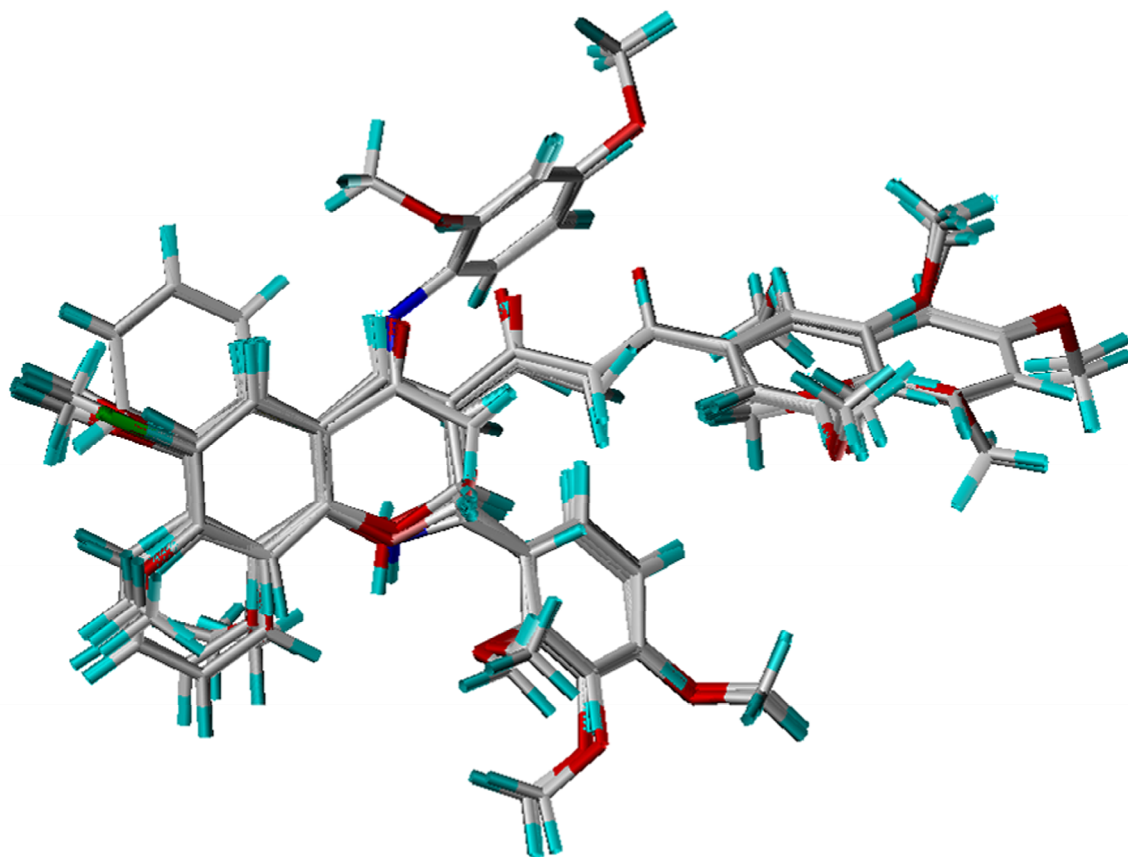

Figure S5. Hirachiral cluster analysis.

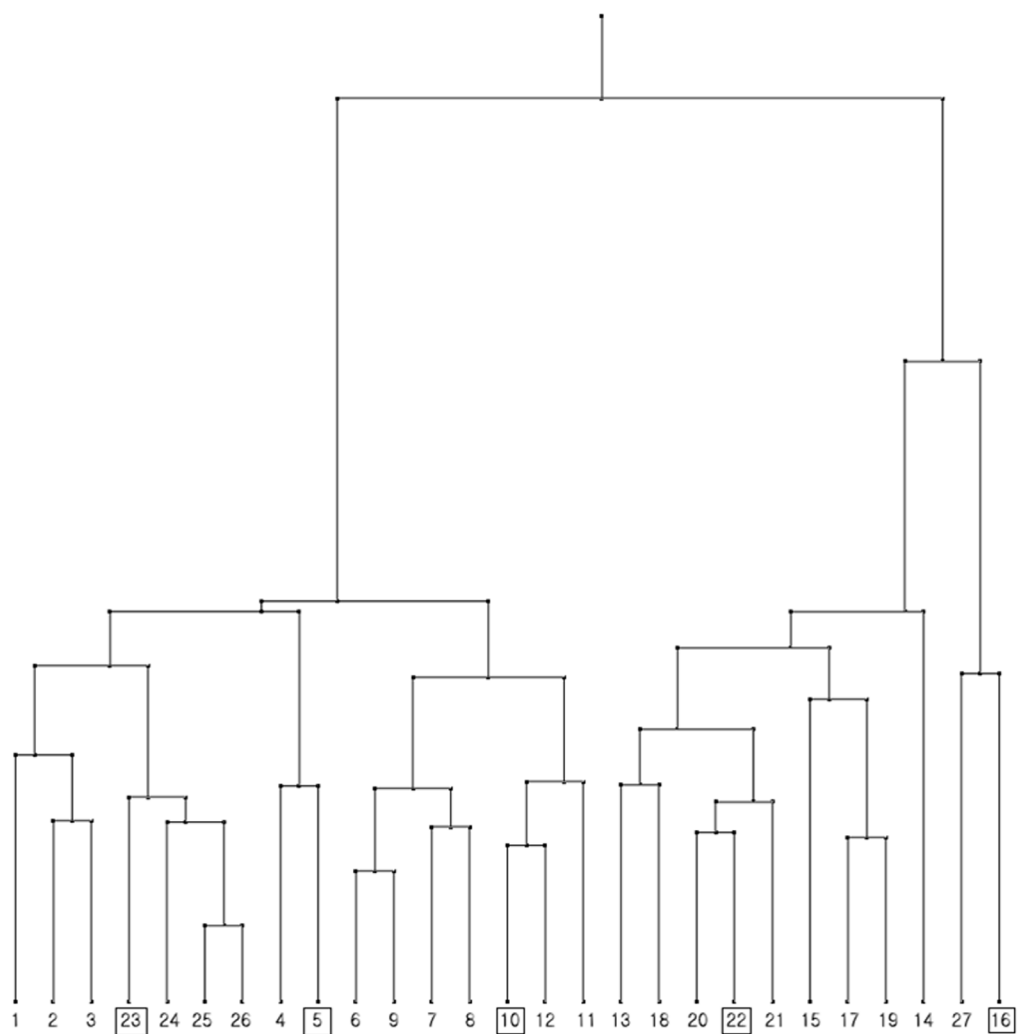

**Scheme S1.** The procedure for the preparation of polyphenols **6** and **9**.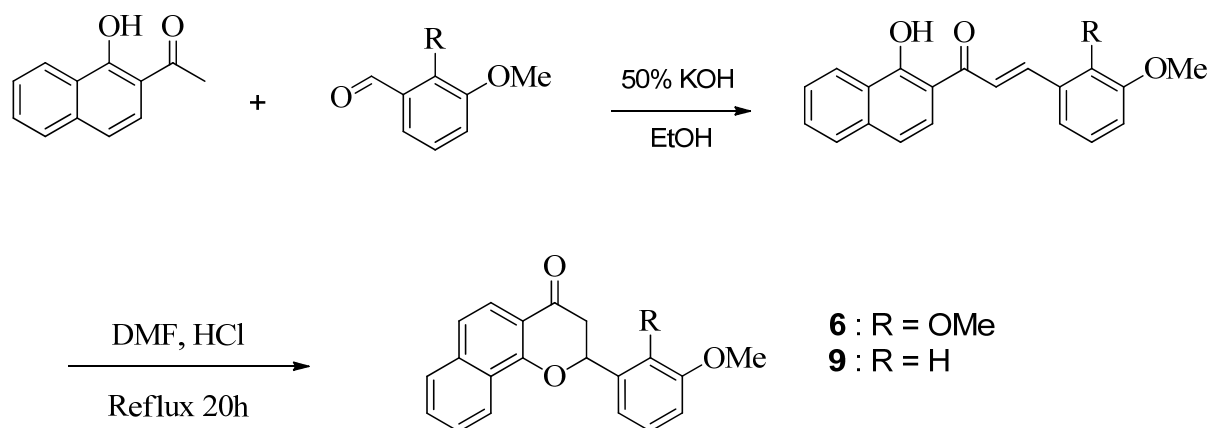

© 2013 by the authors; licensee MDPI, Basel, Switzerland. This article is an open access article distributed under the terms and conditions of the Creative Commons Attribution license (<http://creativecommons.org/licenses/by/3.0/>).
